# Supplementary material for: Pd@Rh core–shell nanocrystals with well-defined facets and their enhanced catalytic performance towards CO oxidation
Source: Royal Society of Chemistry journal article supplement (doi:10.1039/c9nh00360f), 2019-01-01
Supplement: c9nh00360f1.pdf [file c9nh00360f1.pdf]

Electronic Supplementary Information for

## **Pd@Rh Core-Shell Nanocrystals with Well-Defined Facets and Their Enhanced Catalytic Performance towards CO Oxidation**

Sang-Il Choi,<sup>ab</sup> Allison Young,<sup>c</sup> Sujin R. Lee,<sup>d</sup> Cheng Ma,<sup>e</sup> Ming Luo,<sup>a</sup> Miaofang Chi,<sup>e</sup> Chia-Kuang Tsung<sup>\*c</sup> and Younan Xia<sup>\*adf</sup>

<sup>a</sup>The Wallace H. Coulter Department of Biomedical Engineering, Georgia Institute of Technology and Emory University, Atlanta, Georgia 30332, United States

<sup>b</sup>Department of Chemistry and Green-Nano Materials Research Center, Kyungpook National University, Daegu 41566, Republic of Korea.

<sup>c</sup>Department of Chemistry, Merkert Chemistry Center, Boston College, Chestnut Hill, Massachusetts 02467, United States

<sup>d</sup>School of Chemistry and Biochemistry, Georgia Institute of Technology, Atlanta, Georgia 30332, United States

<sup>e</sup>Materials Science and Technology Division, Oak Ridge National Laboratory, Oak Ridge, Tennessee 37830, United States

<sup>f</sup>School of Chemical and Biomolecular Engineering, Georgia Institute of Technology, Atlanta, Georgia 30332, United States

<sup>\*</sup>Corresponding authors: frank.tsung@bc.edu (C.K.T. for CO oxidation measurements); younan.xia@bme.gatech.edu (Y.X. for synthesis and characterization)

**Table S1.** The average number (n) of Rh atomic layers calculated from the ICP–MS data for the Pd and Rh contents in the Pd@Rh core-shell nanocrystals, the weight percentage (wt%) of Rh obtained from the ICP–MS data, and the wt% of Rh derived from the average number of Rh atomic layers and the size of the Pd seeds such as octahedra and cubes.

| <b>Samples</b>             | <b>Average number of<br/>Rh atomic layers<br/>(n)</b> | <b>wt% of Rh<br/>obtained from the<br/>ICP–MS data</b> | <b>wt% of Rh<br/>calculated from<br/>the value of n</b> |
|----------------------------|-------------------------------------------------------|--------------------------------------------------------|---------------------------------------------------------|
| <b>Pd@Rh<br/>octahedra</b> | 2.1                                                   | 42.2                                                   | 39.8 (n=2)                                              |
| <b>Pd@Rh<br/>cubes</b>     | 2.9                                                   | 36.6                                                   | 37.8 (n=3)                                              |

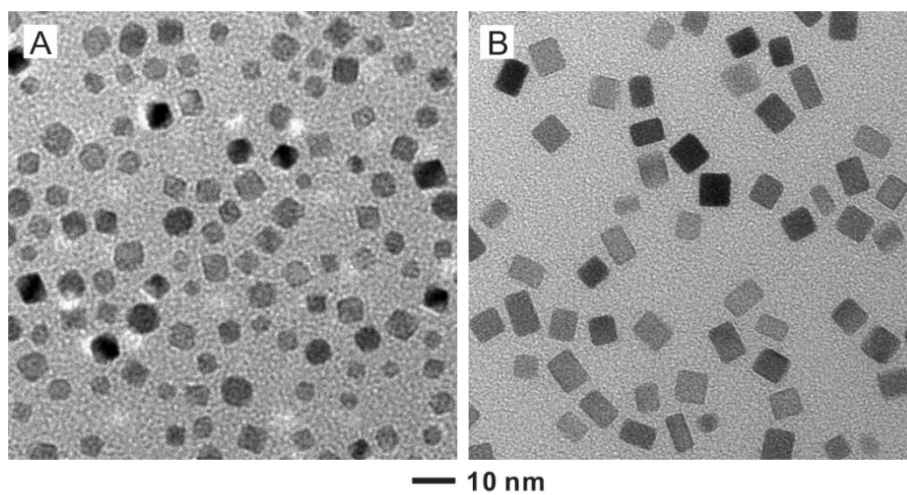

**Fig. S1** TEM images of (A) Pd octahedra and (B) Pd cubes with average edge lengths of 6.4 and 7.2 nm, respectively, which served as seeds for the overgrowth of Rh.

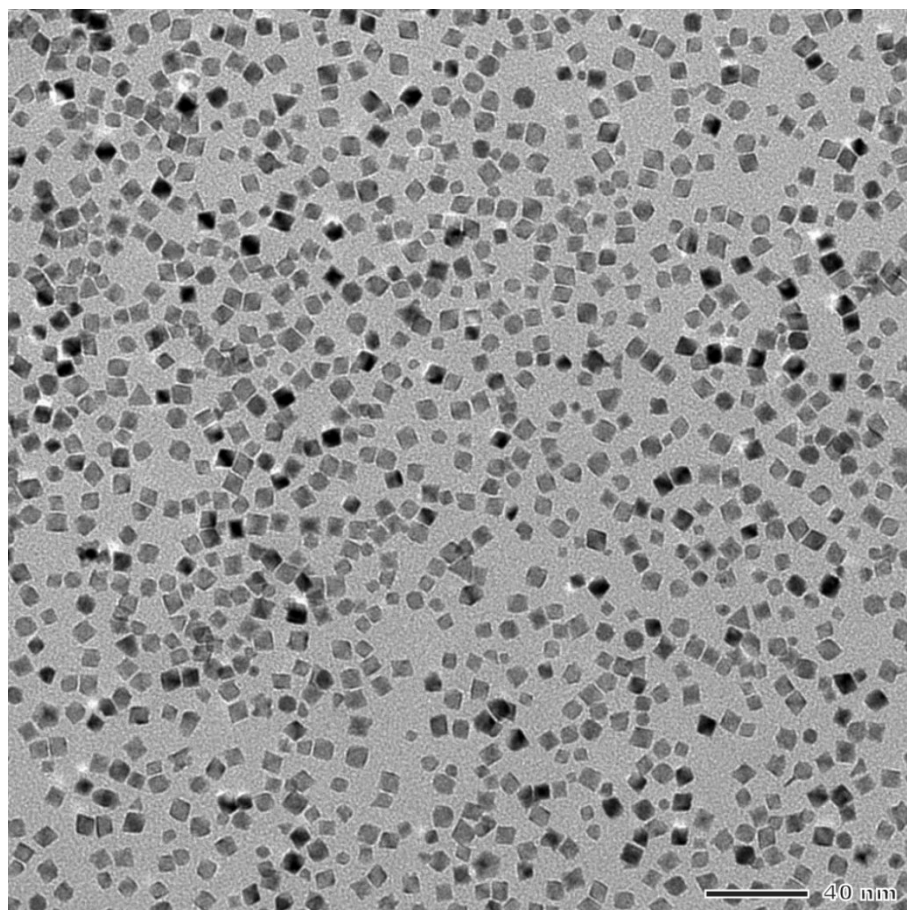

**Fig. S2** TEM image of Pd@Rh core-shell octahedra at a relatively low magnification to show uniformity in both size and shape.

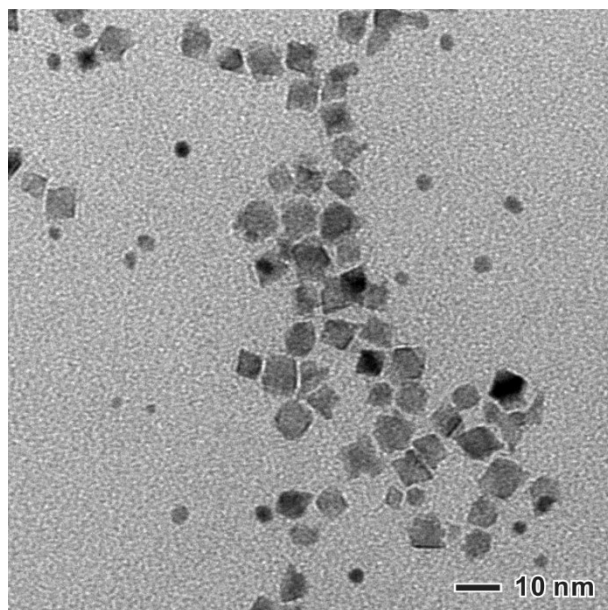

**Fig. S3** TEM image of a product containing both Pd@Rh core-shell octahedra and small Rh nanocrystals when a larger volume (81  $\mu\text{L}$ ) of  $\text{Rh}(\text{OAc})_3$  solution was used while all other conditions were kept the same as the standard protocol.

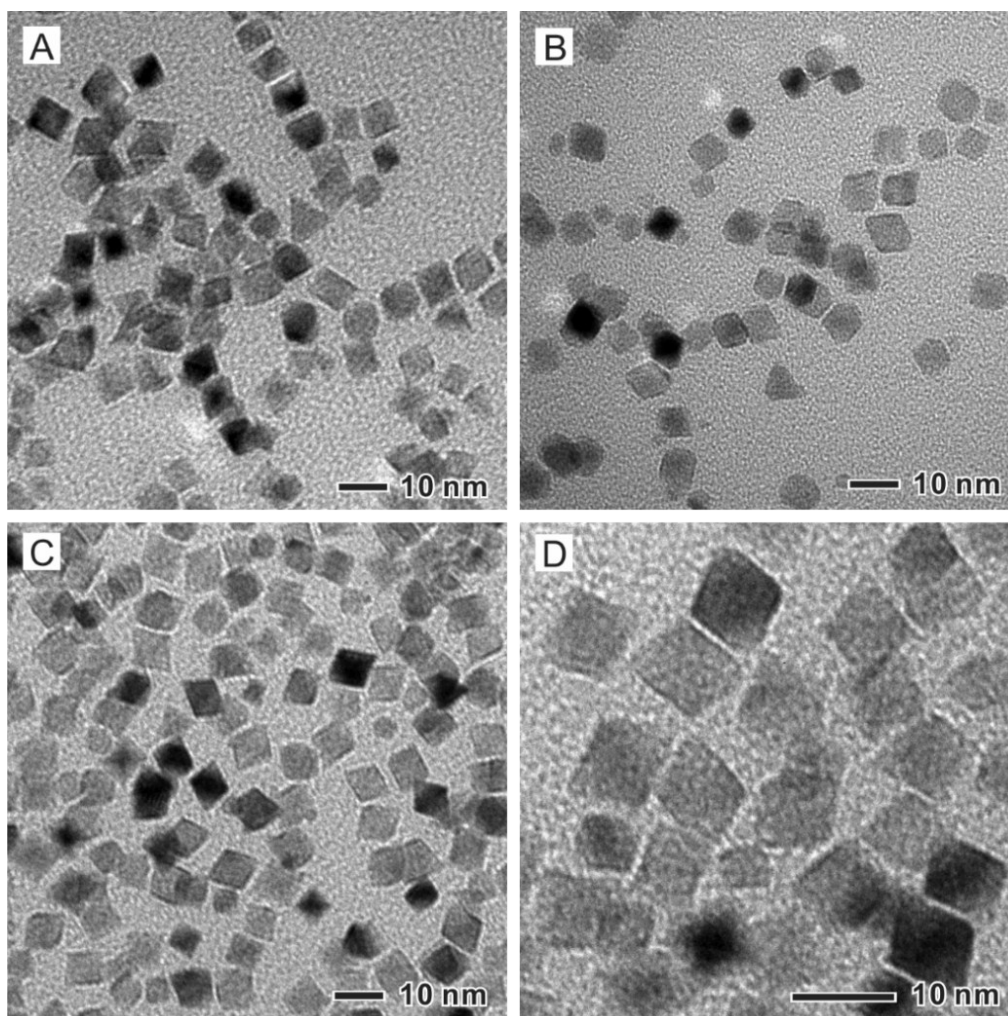

**Fig. S4** TEM images of Pd@Rh core-shell octahedra prepared using different Rh precursors, including (A)  $\text{RhCl}_3$ , (B)  $\text{Rh}(\text{NO}_3)_3$ , and (C, D)  $\text{Rh}(\text{acac})_3$ , respectively, using a protocol similar to what was used for the Pd@Rh octahedra shown in Fig. 1.

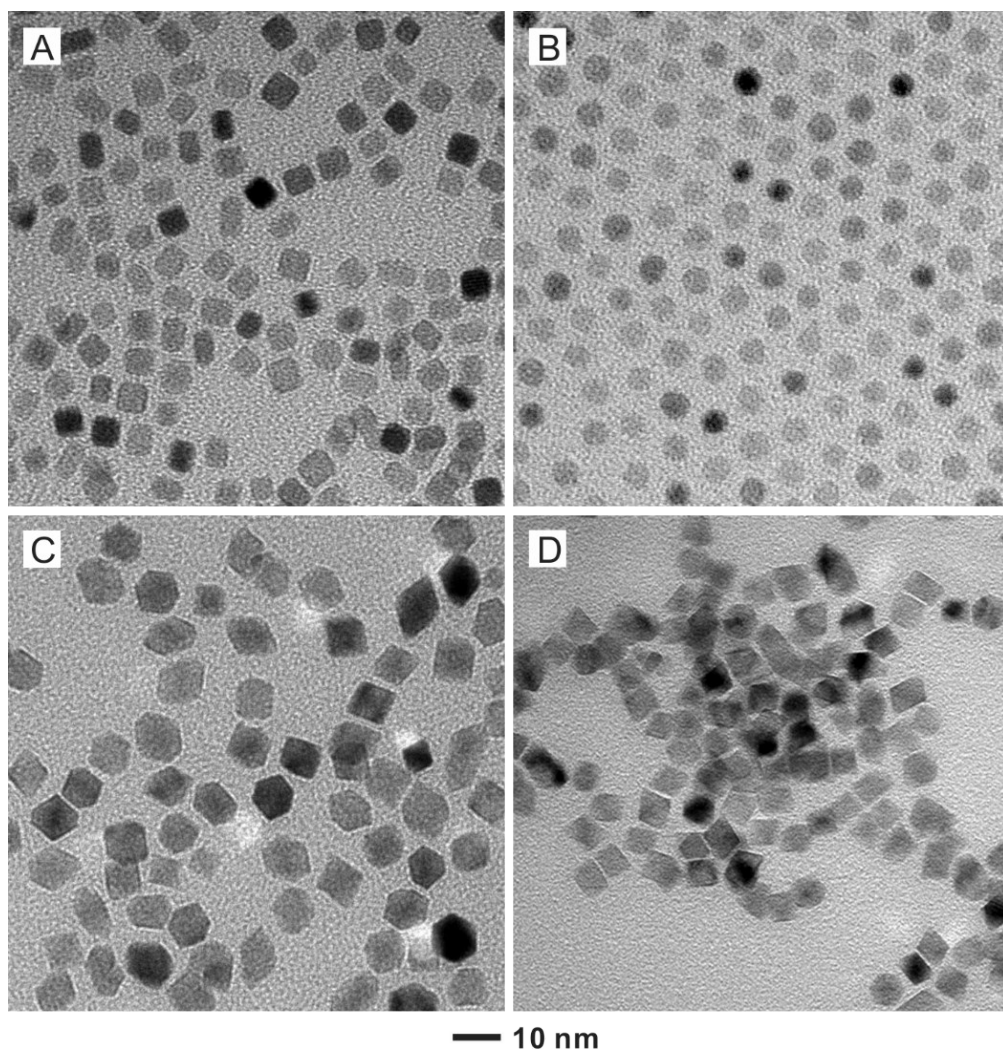

**Fig. S5** TEM images of (A) Pd cubes and (B) Pd cuboctahedra. TEM images of Pd@Rh octahedra grown from the (C) cubic and (D) cuboctahedral, respectively, seeds of Pd, with a protocol similar to what was used for the Pd@Rh octahedra shown in Fig. 1.

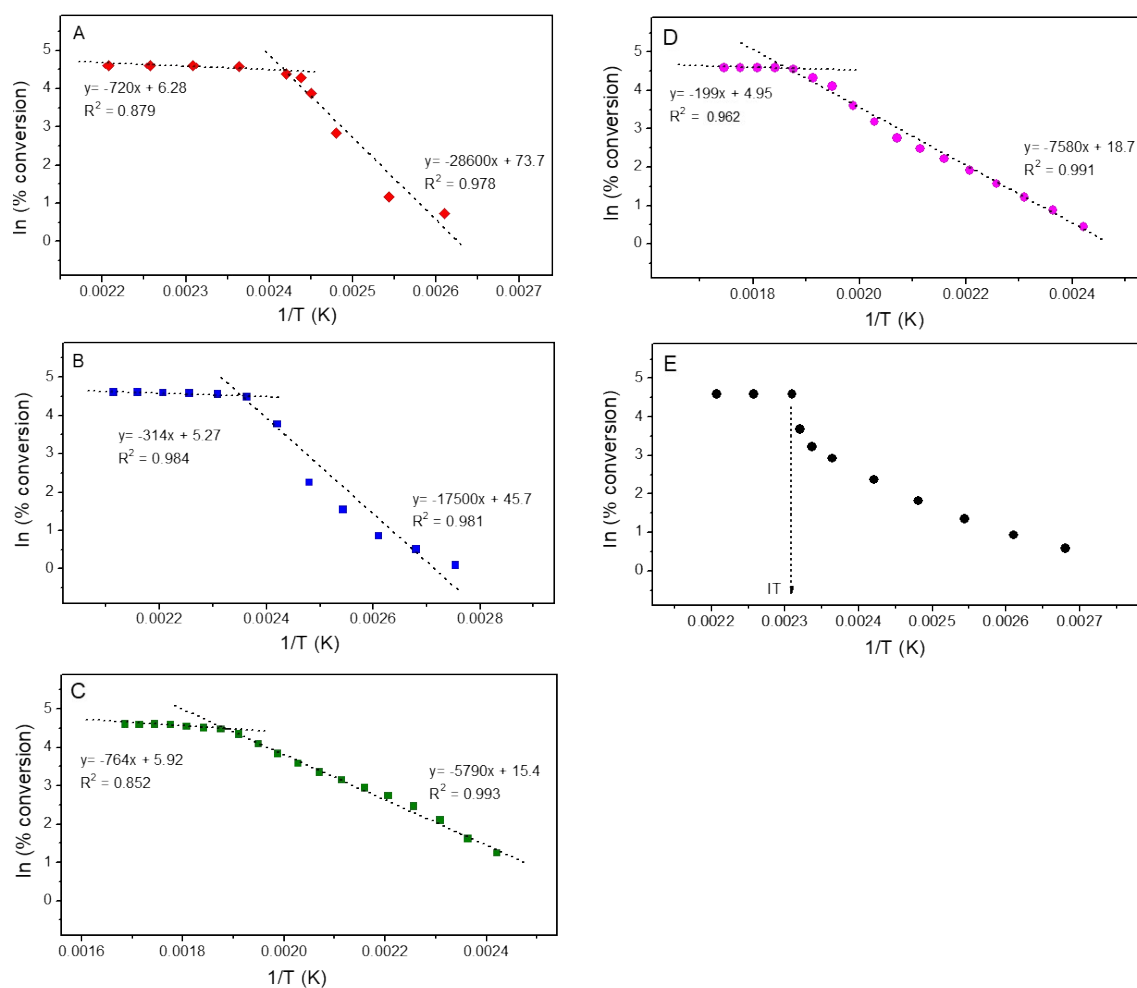

**Fig. S6** Arrhenius plots for determining the ignition temperatures (ITs) of CO oxidation for (A) octahedral Pd@Rh/SBA15, (B) cubic Pd@Rh/SBA15 (C) cubic Rh/SBA15, and (D) Rh/C. The trend line analysis displays percentage conversion as a function of the reciprocal of temperature in Kelvin. (E) IT of CO oxidation for Pt/Al<sub>2</sub>O<sub>3</sub> catalysts, which was supposed to be at 160 °C.



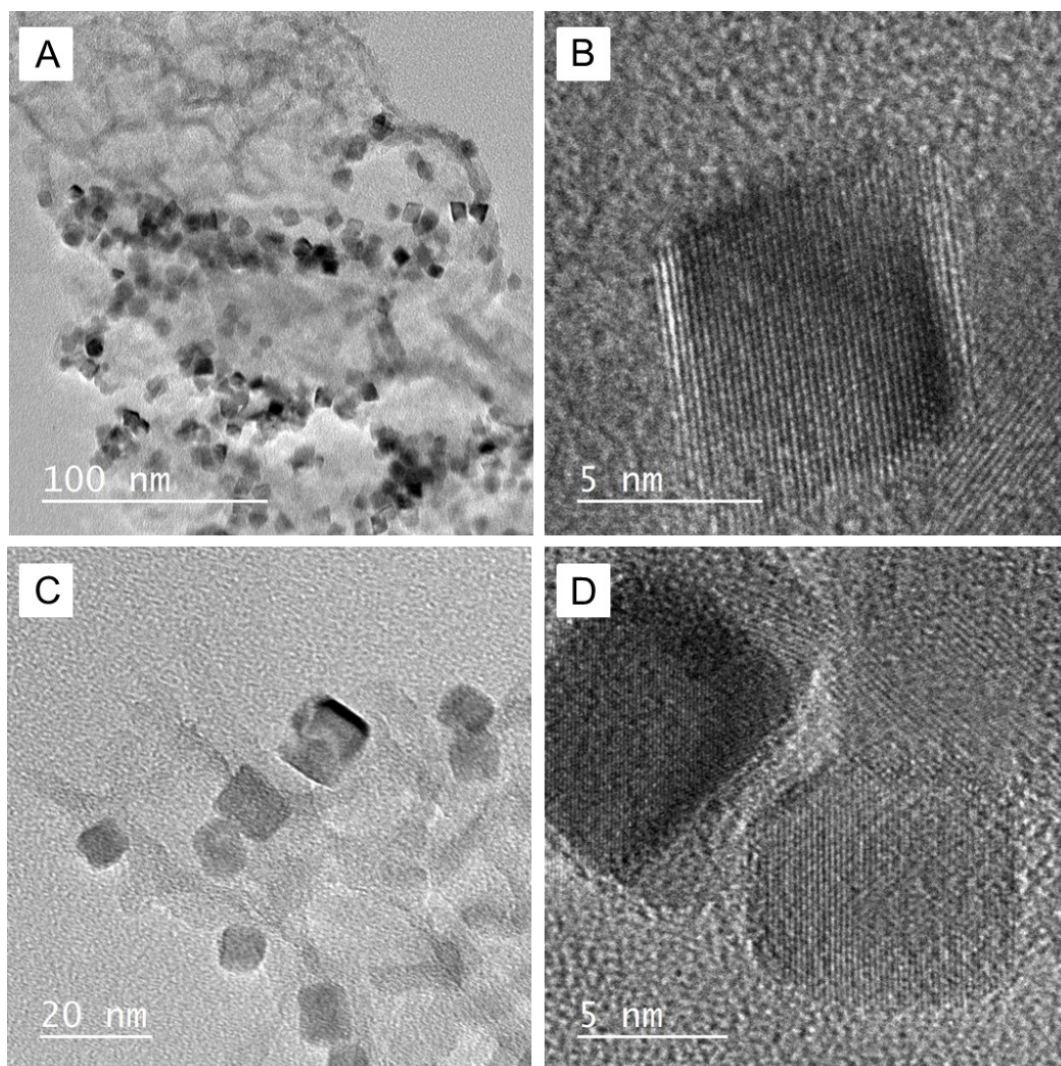

**Fig. S7** TEM and high-resolution TEM images of (A, B) Pd@Rh/SBA15 octahedra and (C, D) Pd@Rh/SBA15 cubes after going through the catalytic CO oxidation reaction.
